# Supplementary material for: Surface immobilized Cu-1,10-phenanthroline complexes with α-aminophosphonate groups in the 5-position as heterogenous catalysts for efficient atom-transfer radical cyclizations
Source: Royal Society of Chemistry journal article supplement (doi:10.1039/d3dt01467c), 2023-01-01
Supplement: d3dt01467c1.pdf [file d3dt01467c1.pdf]

## Surface Immobilized Cu-1,10-Phenanthroline Complexes with $\alpha$ -Aminophosphonate Groups in the 5-Position as Heterogenous Catalysts for Efficient Atom-Transfer Radical Cyclizations

Sarah E. Maier<sup>a</sup>, Osman Bunjaku<sup>a</sup>, Elif Kaya<sup>a</sup>, Michael Dyballa<sup>a</sup>, Wolfgang Frey<sup>b</sup>, Deven P. Estes<sup>a\*</sup>

*a) Institute of Technical Chemistry, Pfaffenwaldring 55, 70569 Stuttgart, Germany.*

*b) Institute of Organic Chemistry, Pfaffenwaldring 55, 70569 Stuttgart, Germany.*

\* *deven.estes@itc.uni-stuttgart.de*

### Supporting Information

Original raw datasets can be obtained free of charge through the Data Repository of the University of Stuttgart (DARUS) via the DOI: 10.18419/darus-3467.

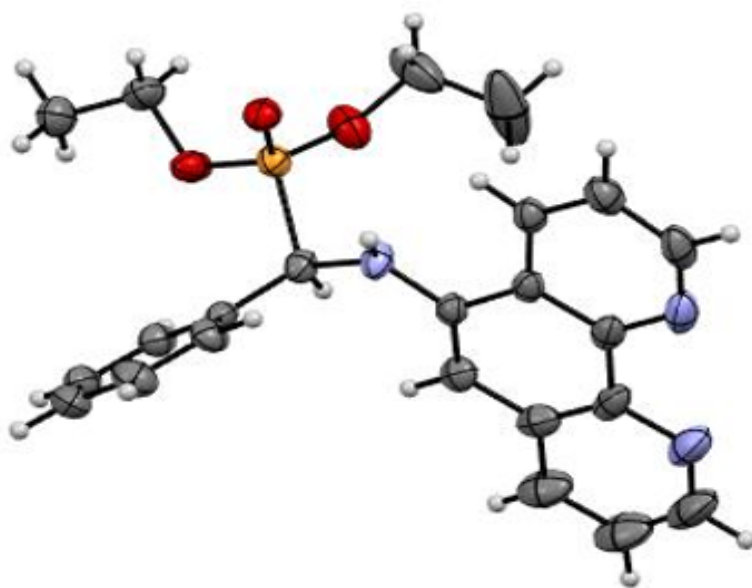

**Figure S1.** X-ray structure of L1, water of crystallization omitted for clarity (Cambridge Crystallographic Database deposition number 2253908)

## NMR-Spectra of new ligands

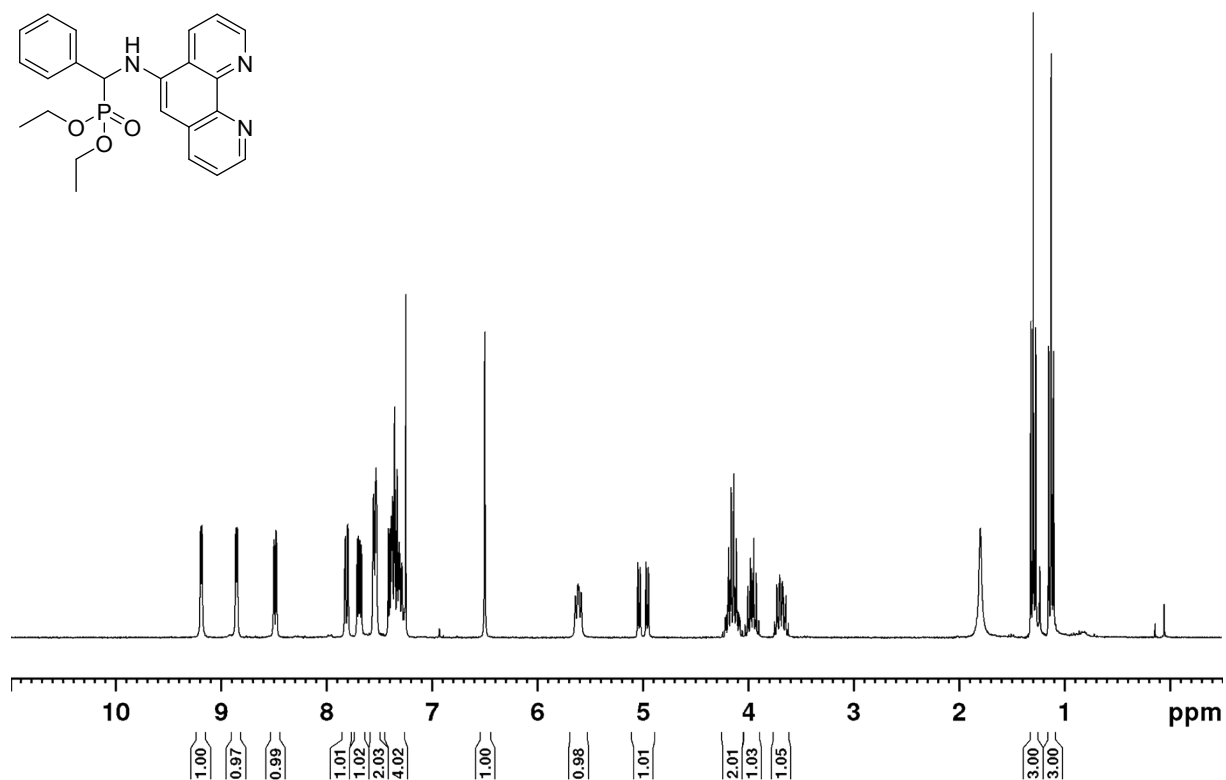

Figure S2.  $^1\text{H-NMR}$  of L1 in  $\text{CDCl}_3$  at  $25^\circ\text{C}$ .

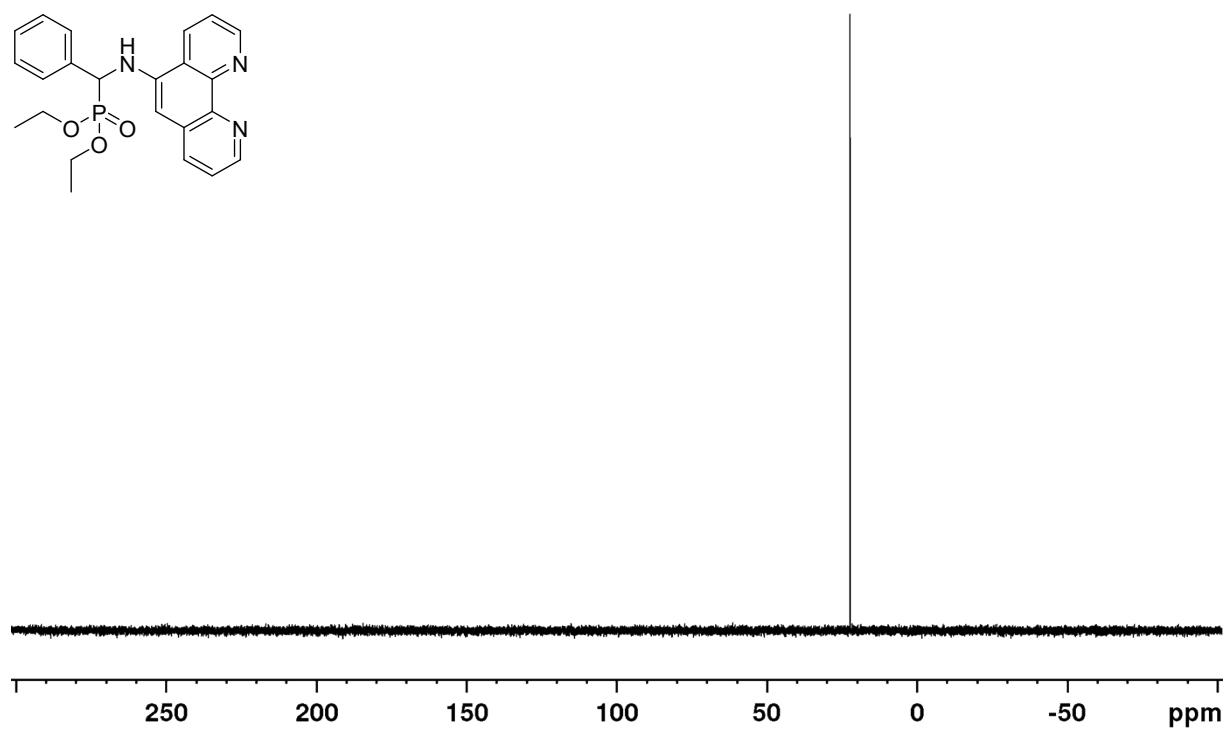

Figure S3.  $^{31}\text{P}\{^1\text{H}\}$ -NMR of L1 in  $\text{CDCl}_3$  at  $25^\circ\text{C}$ .

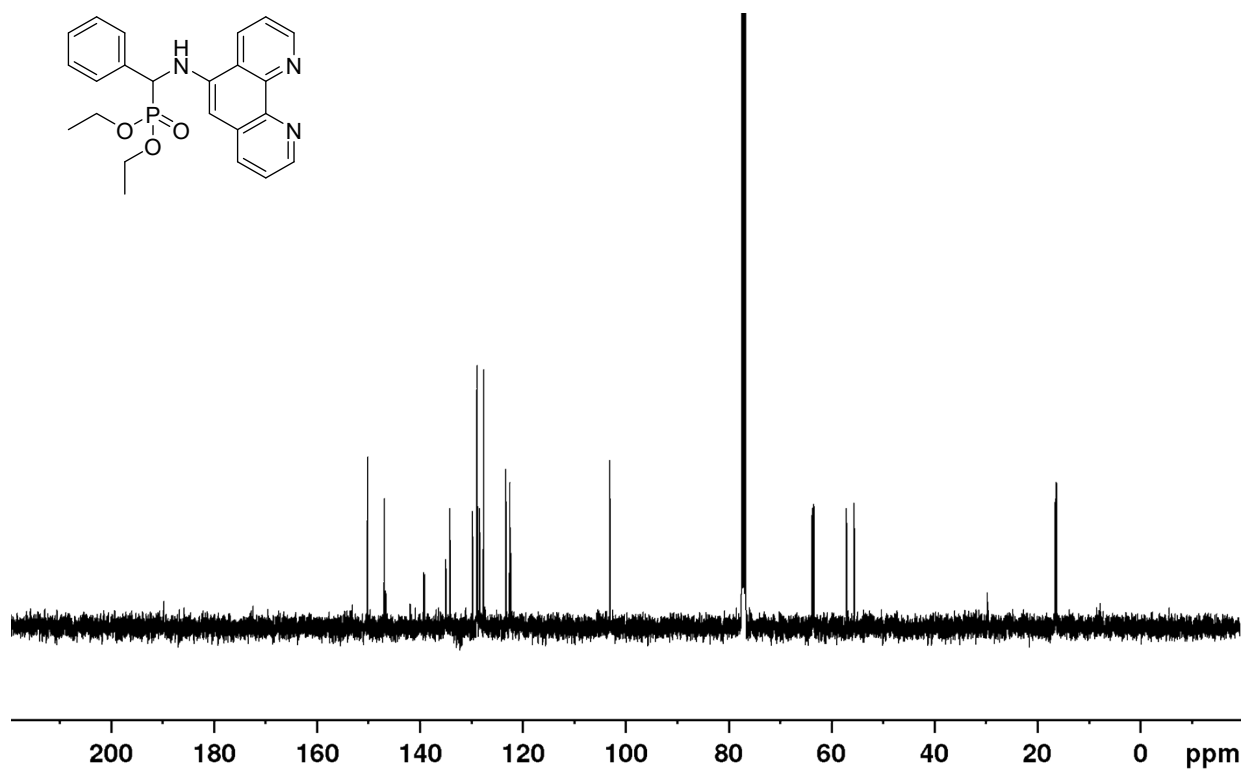

**Figure S4.**  $^{13}\text{C}\{^1\text{H}\}$ -NMR of L1 in  $\text{CDCl}_3$  at  $25^\circ\text{C}$ .

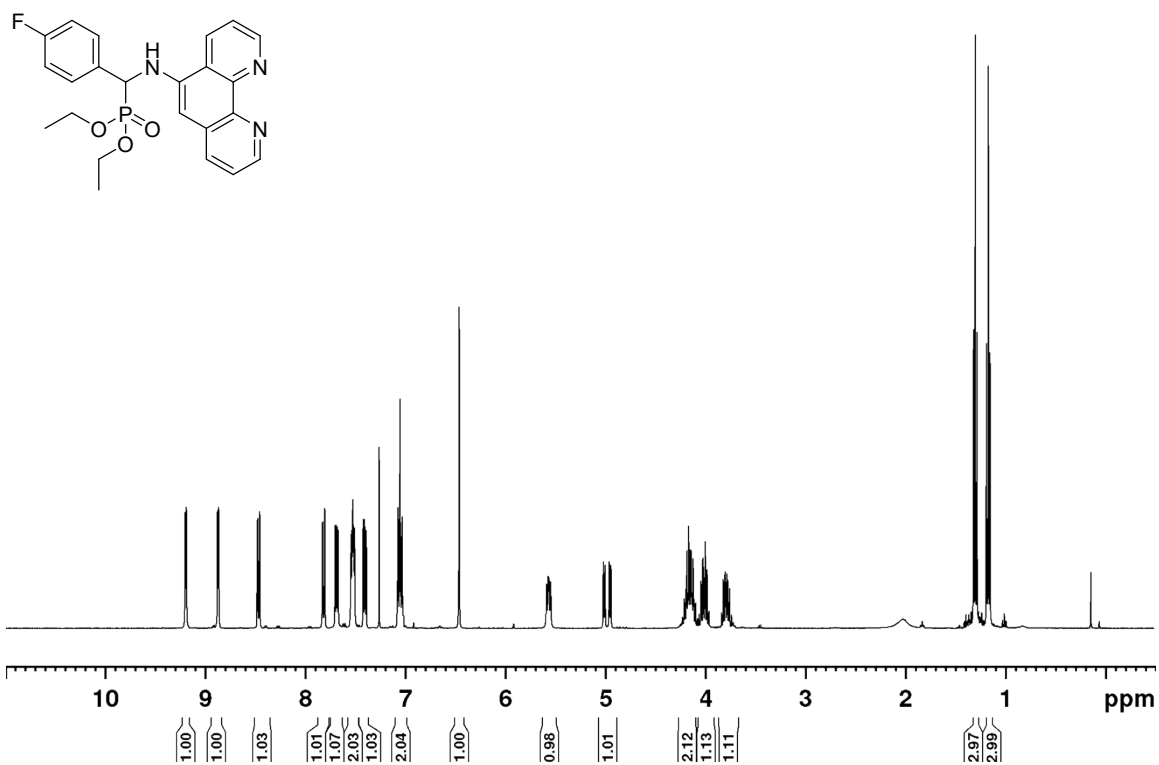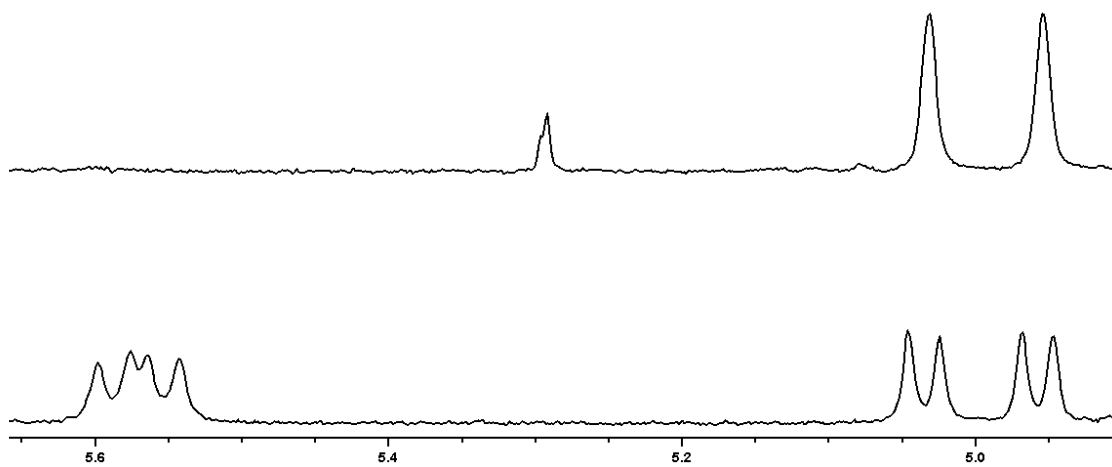

**Figure S5.** <sup>1</sup>H-NMR of **L2** in CDCl<sub>3</sub> at 25°C (top) Close up of CHP and amino-region of the <sup>1</sup>H NMR of **L2** with (middle) and without (bottom) addition of D<sub>2</sub>O.

$^{19}\text{F}\{^1\text{H}\}$ -NMR

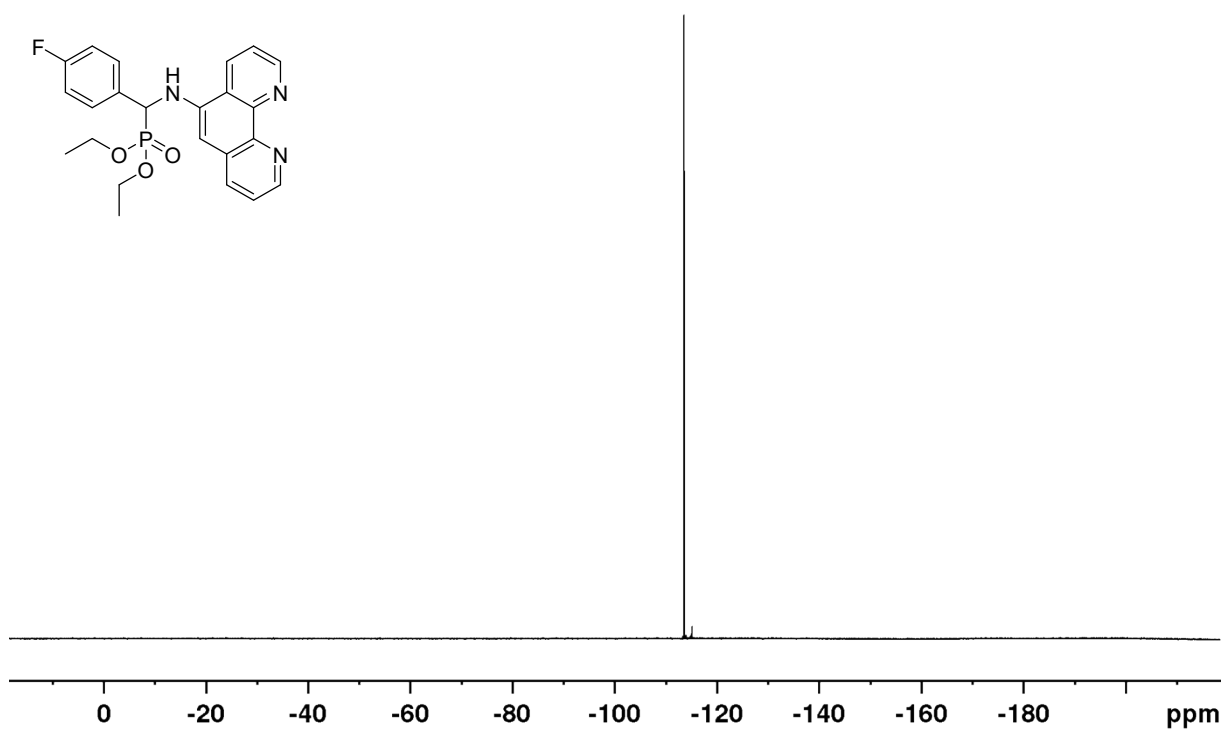

**Figure S6.**  $^{19}\text{F}\{^1\text{H}\}$ -NMR of L2 in  $\text{CDCl}_3$  at 25°C.

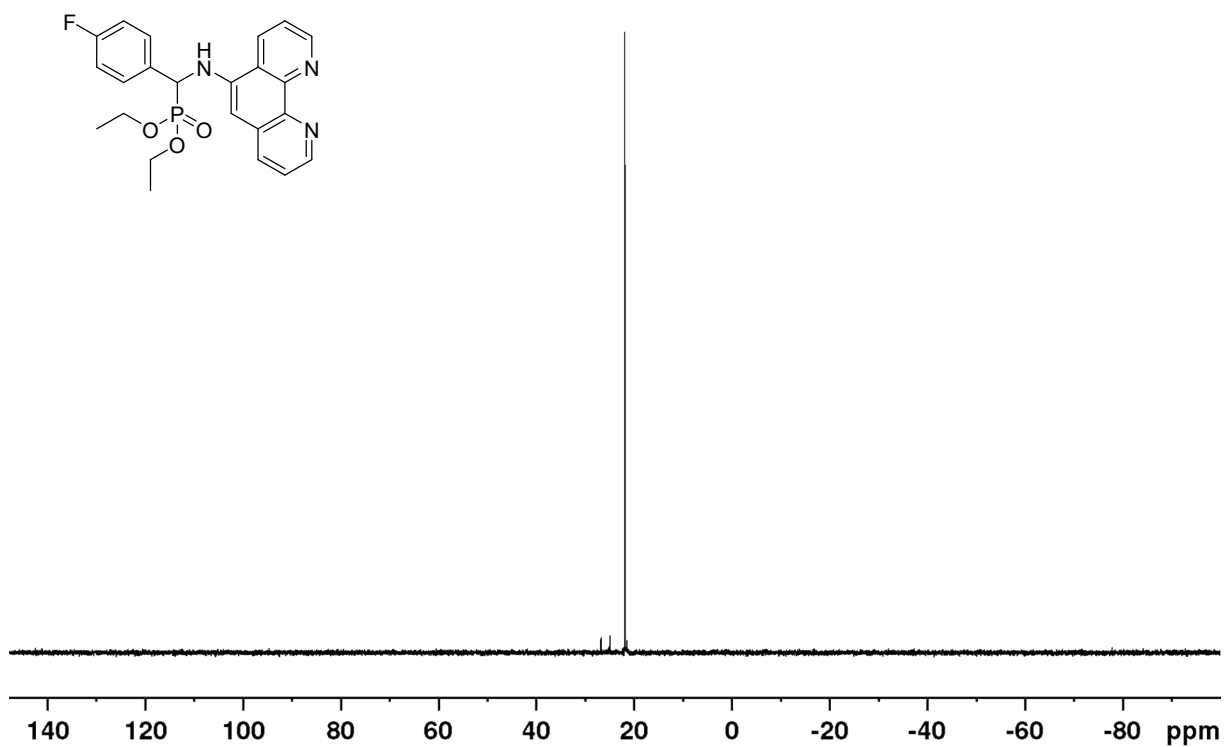

**Figure S7.**  $^{31}\text{P}\{^1\text{H}\}$ -NMR of L2 in  $\text{CDCl}_3$  at 25°C.

$^{13}\text{C}\{^1\text{H}\}$ -NMR

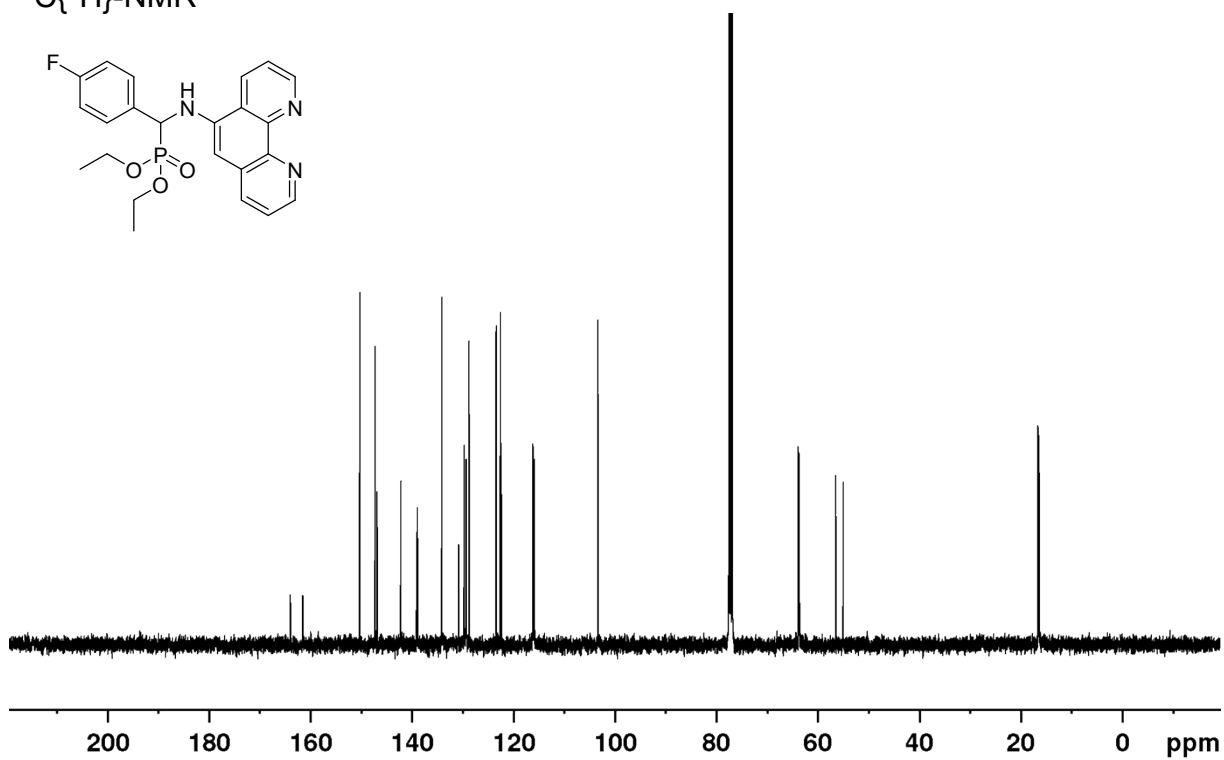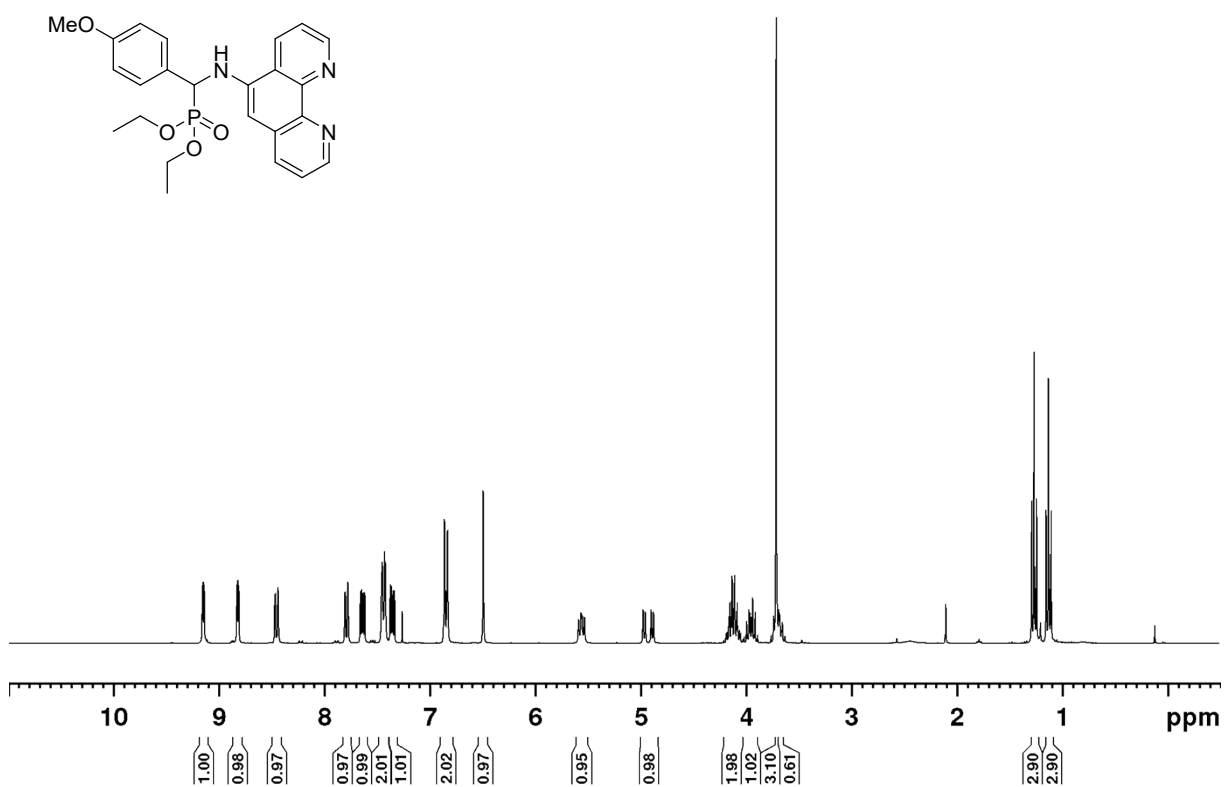

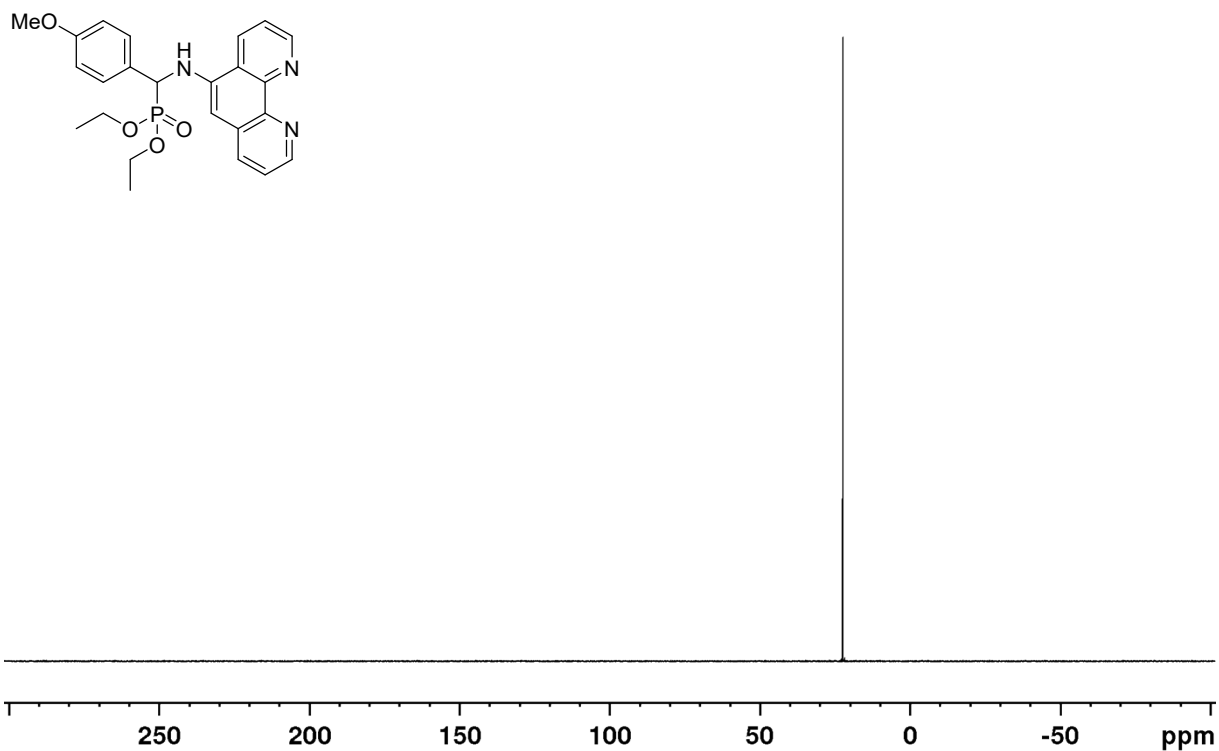

$^{13}\text{C}\{^1\text{H}\}$ -NMR

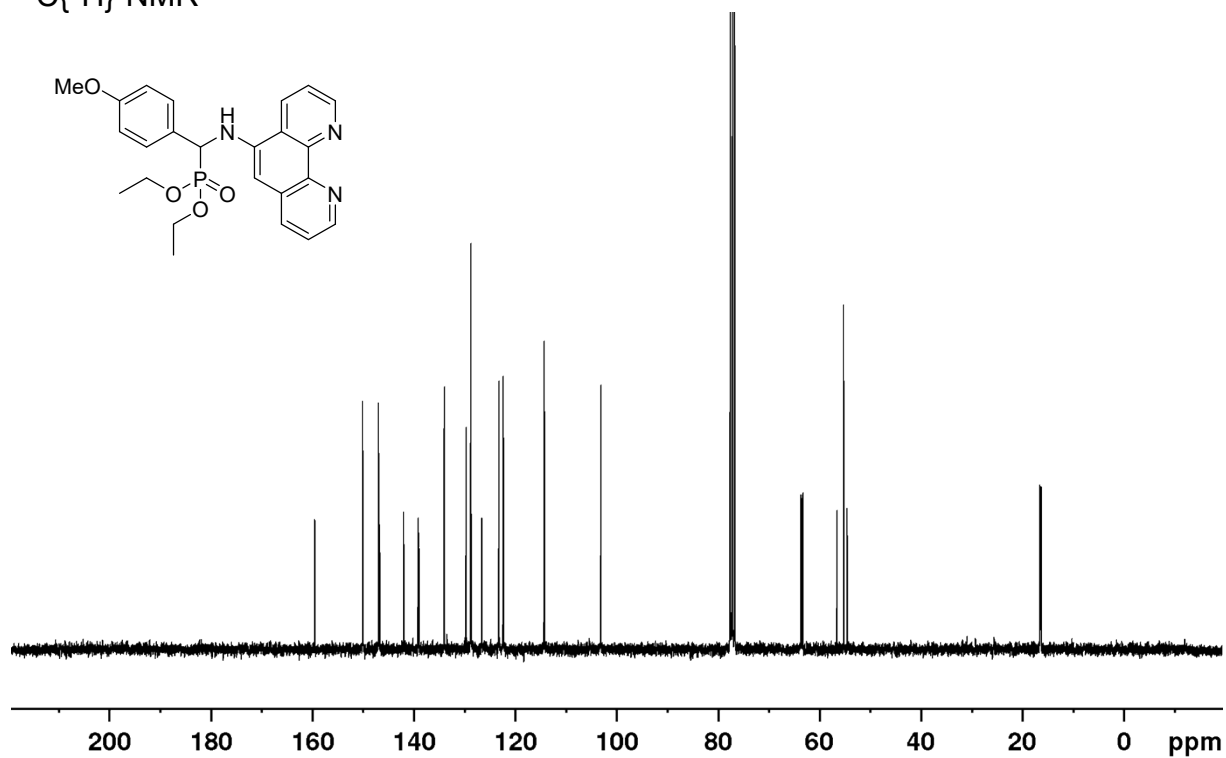

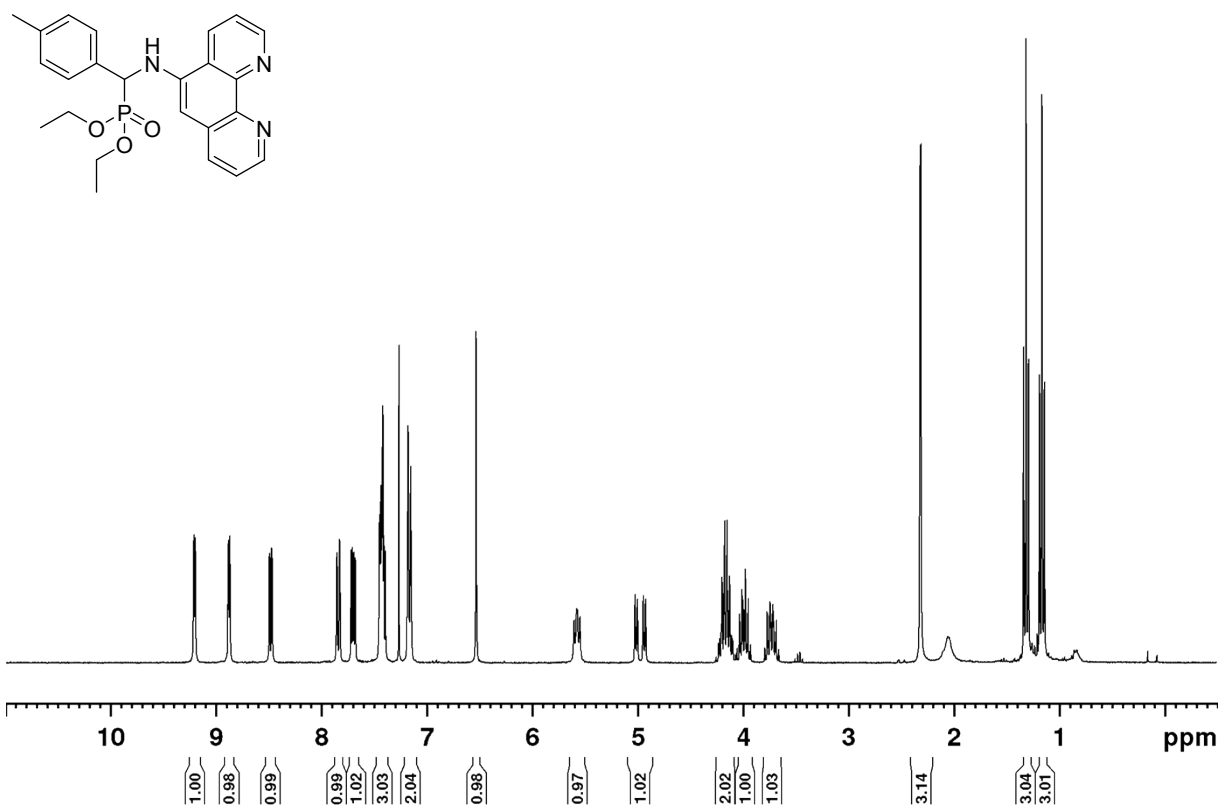

Figure S12. <sup>1</sup>H-NMR of L4 in CDCl<sub>3</sub> at 25°C.

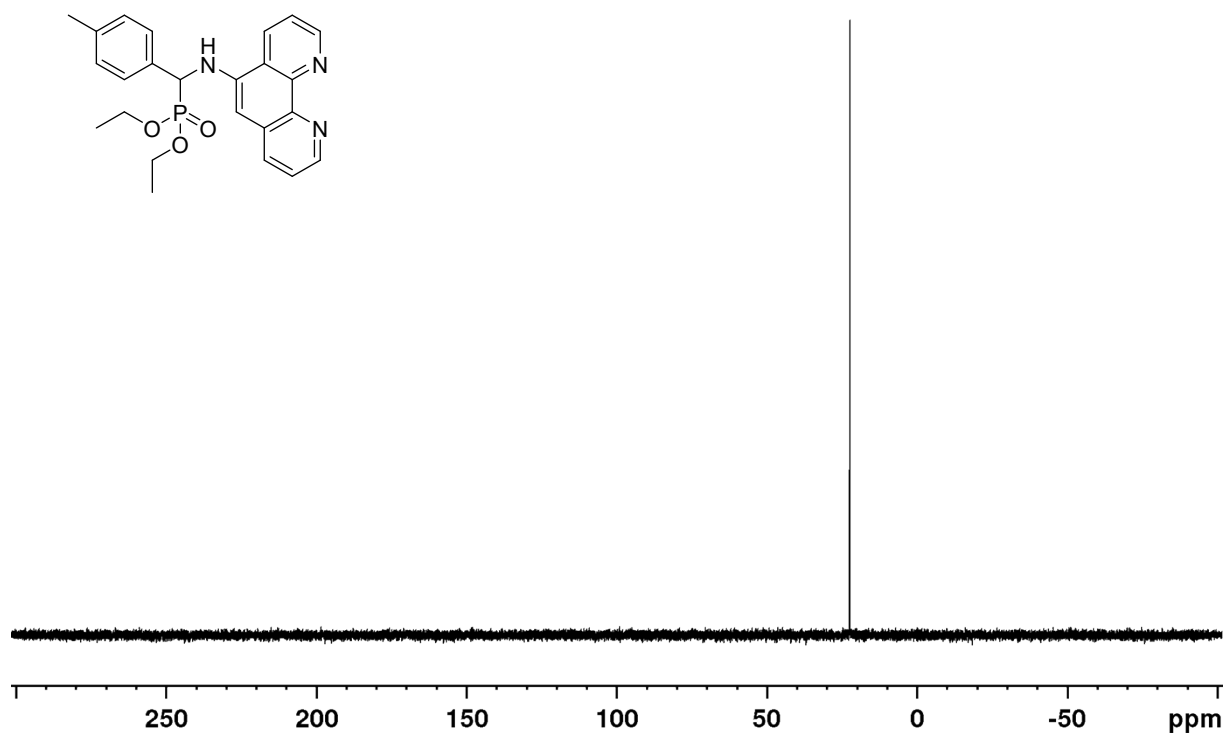

Figure S13. <sup>31</sup>P{<sup>1</sup>H}-NMR of L4 in CDCl<sub>3</sub> at 25°C.



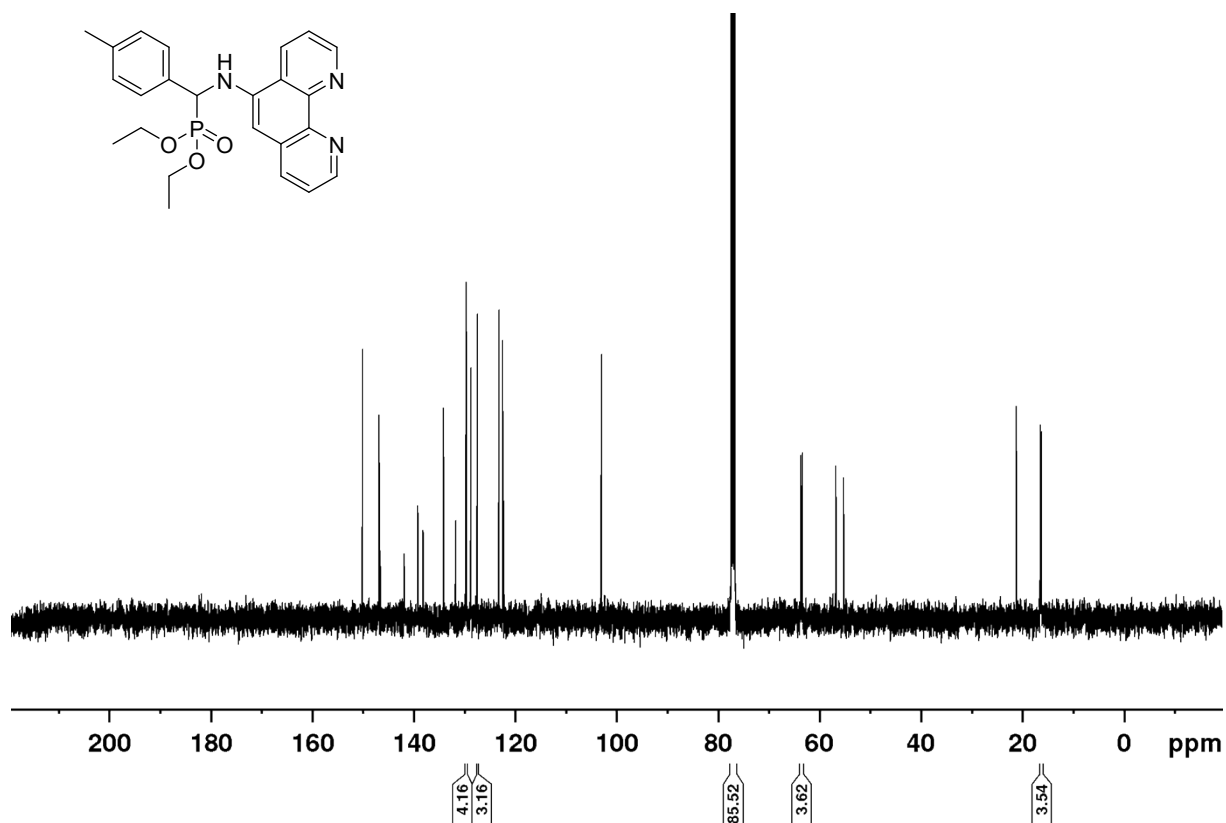

**Figure S14.**  $^{13}\text{C}\{^1\text{H}\}$ -NMR of L4 in  $\text{CDCl}_3$  at  $25^\circ\text{C}$ .

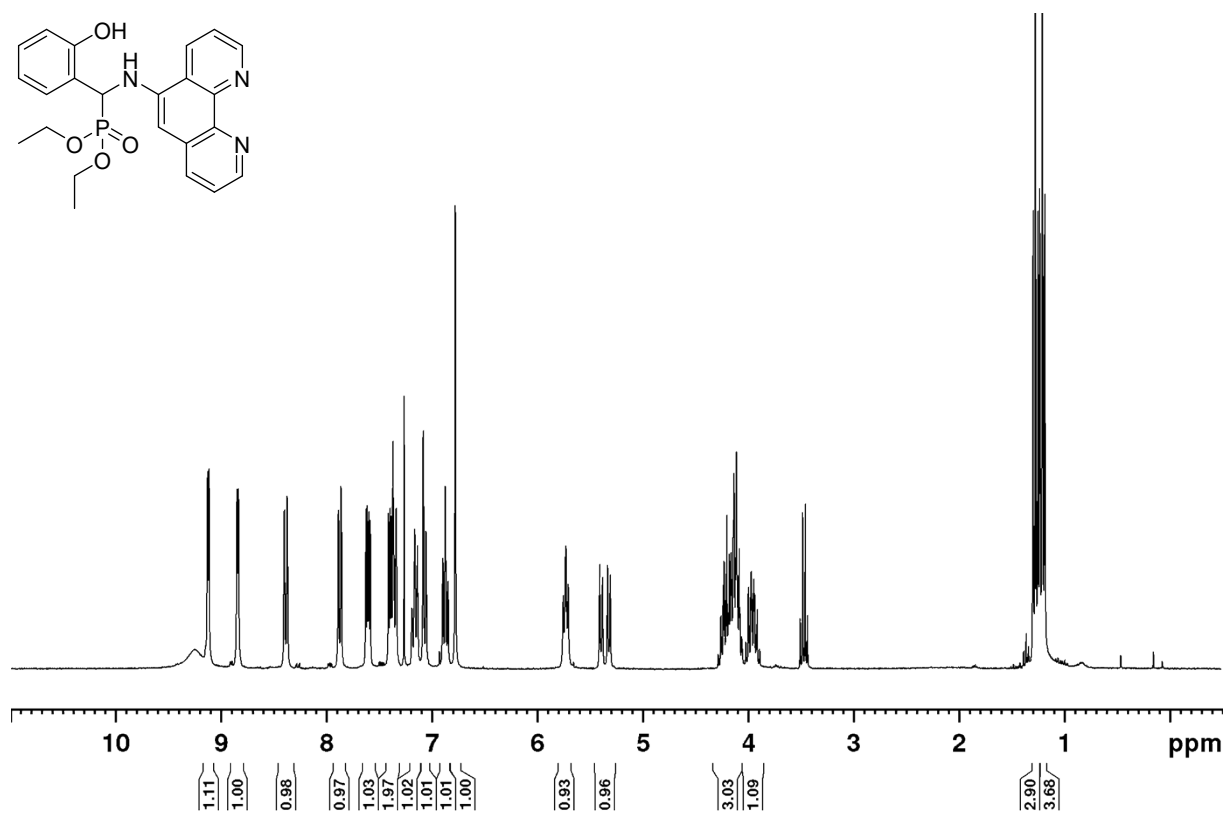

**Figure S15.**  $^1\text{H}$ -NMR of L5 in  $\text{CDCl}_3$  at  $25^\circ\text{C}$ .

$^{31}\text{P}\{^1\text{H}\}$ -NMR

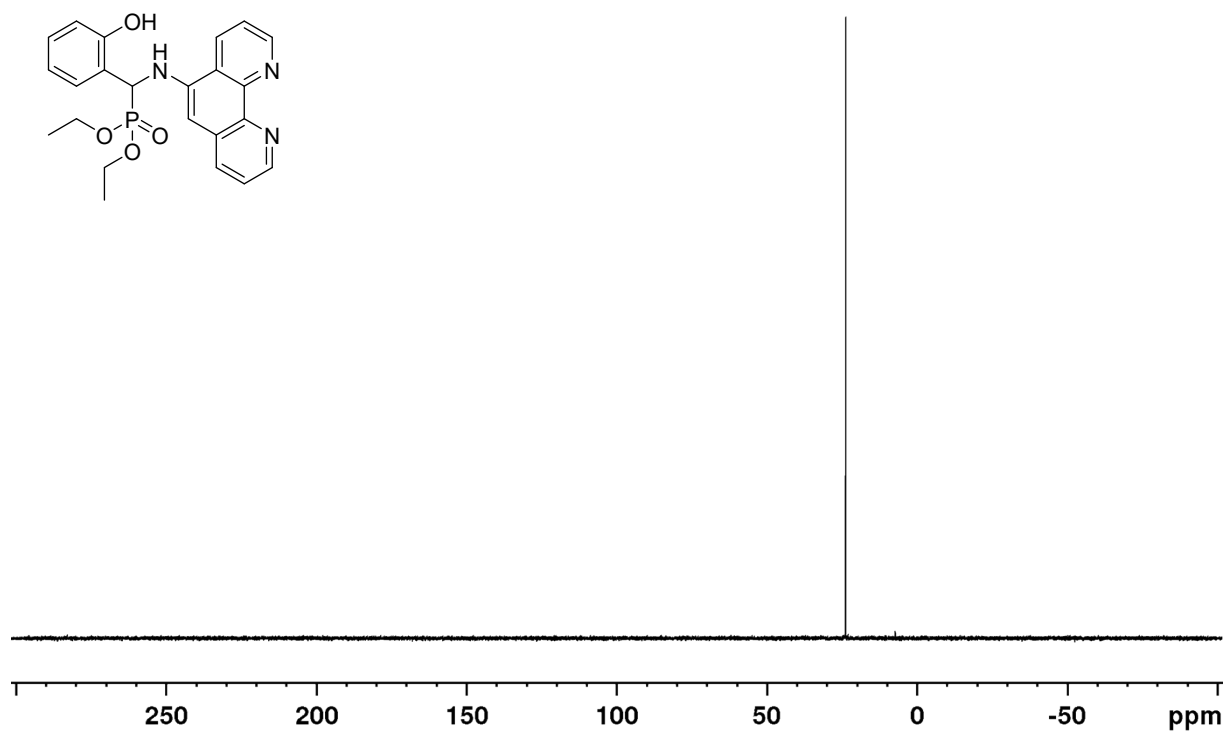

**Figure S16.**  $^{31}\text{P}\{^1\text{H}\}$ -NMR of L5 in  $\text{CDCl}_3$  at 25°C.

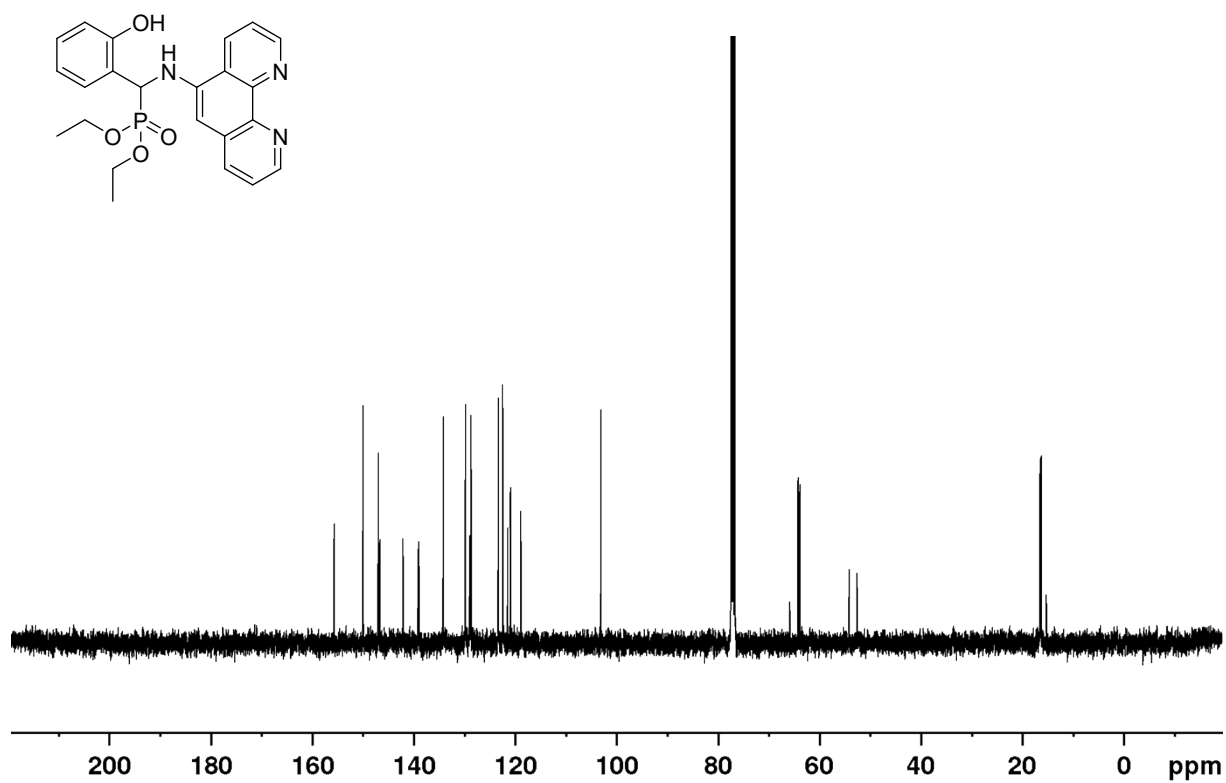

**Figure S17.**  $^{13}\text{C}\{^1\text{H}\}$ -NMR of L1 in  $\text{CDCl}_3$  at 25°C.

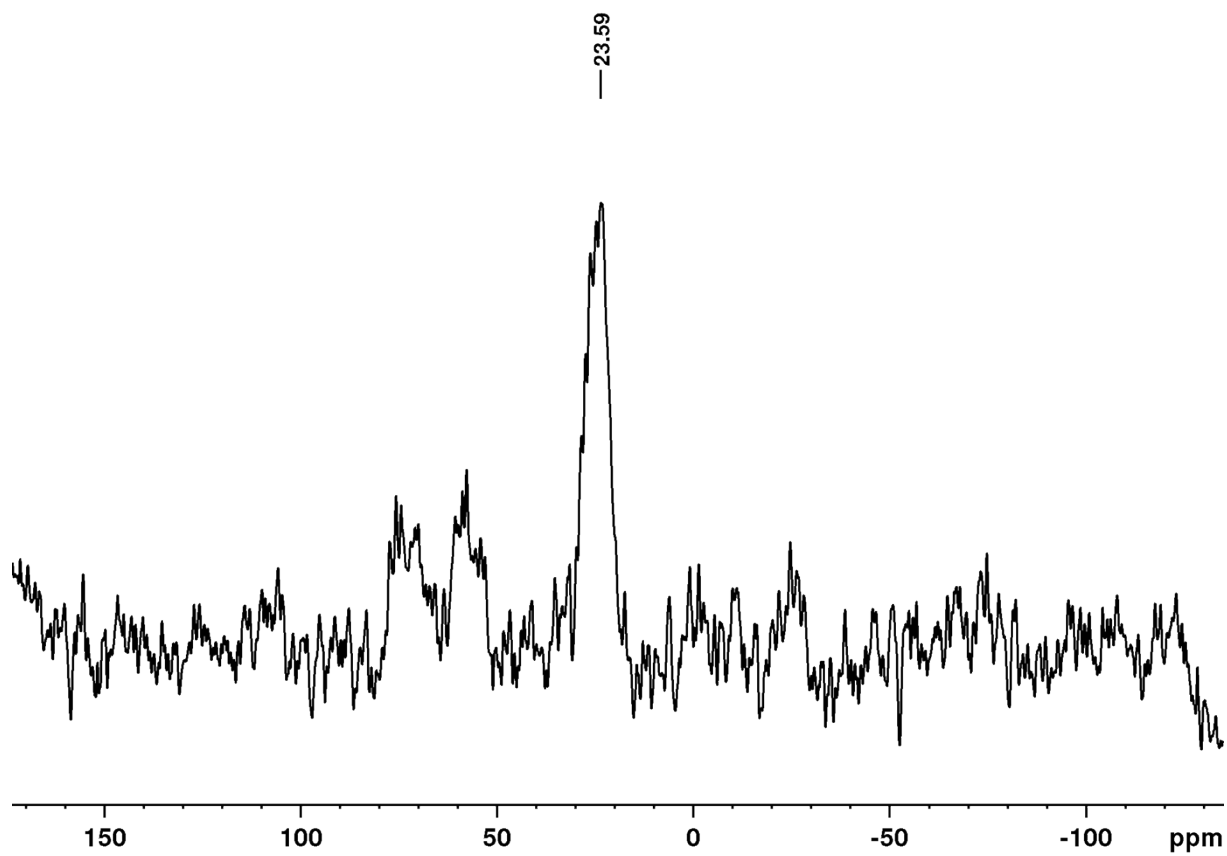

**Figure S18.**  $^{31}\text{P}$ -CPMAS NMR of  $\text{Cu}(\text{L3})_2\text{BF}_4@\text{SiO}_2$ .

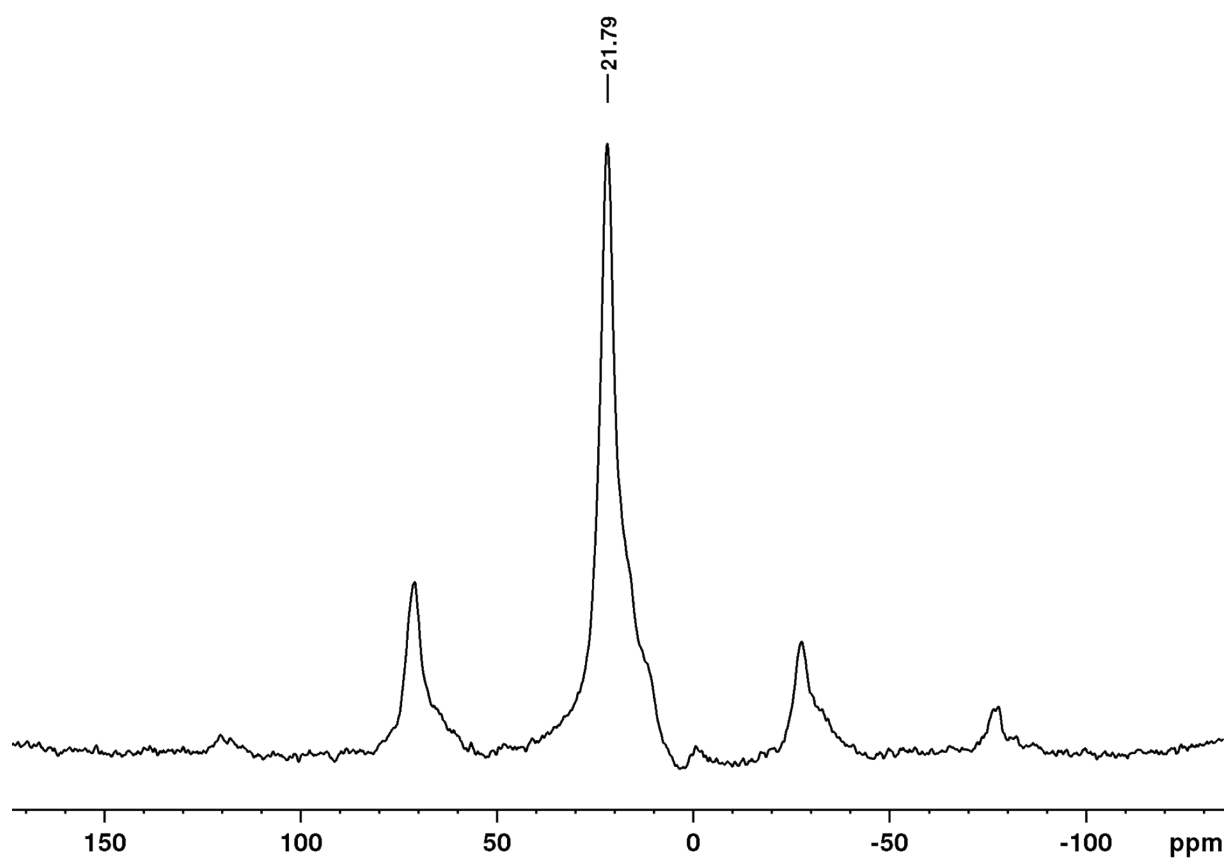

**Figure S19.**  $^{31}\text{P}$  CPMAS NMR of  $\text{L1}@\text{Al}_2\text{O}_3$ .

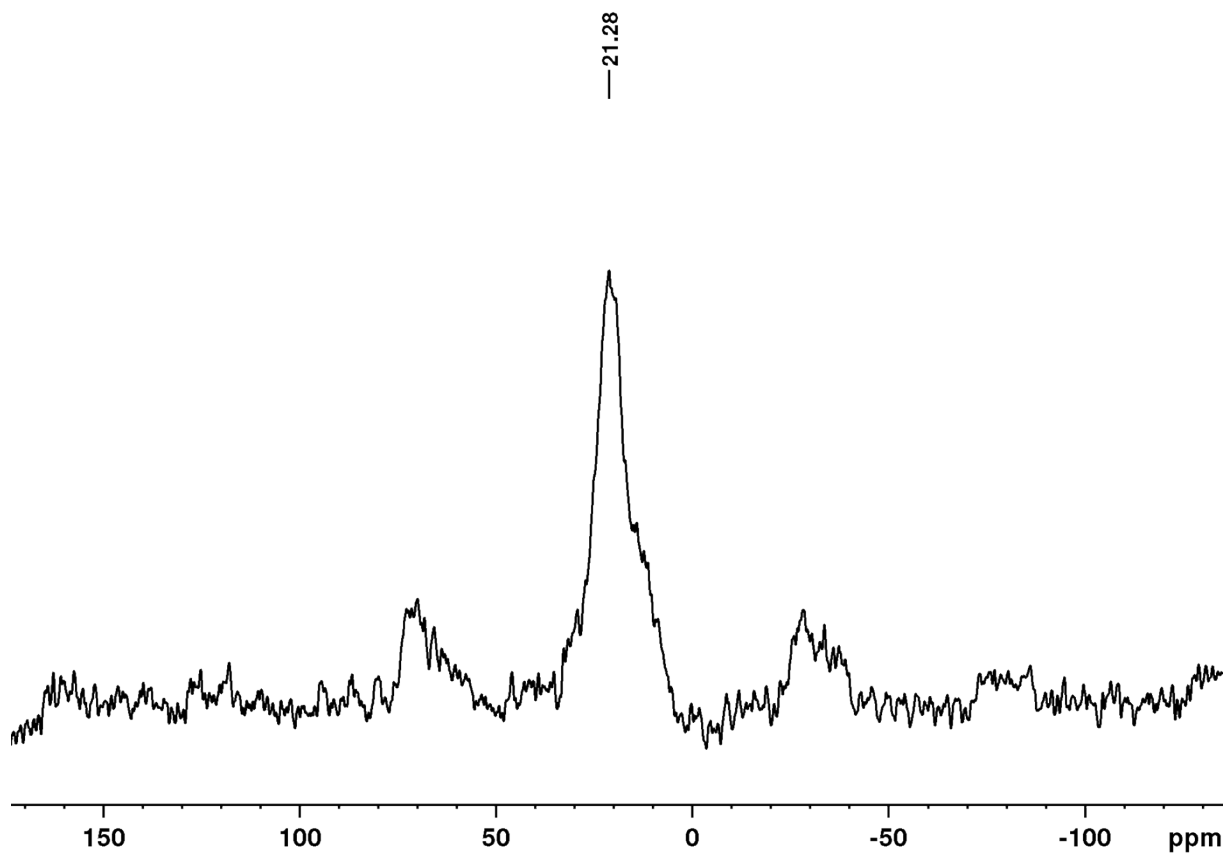

**Figure S20.**  $^{31}\text{P}$  CPMAS NMR of  $\text{Cu}(\text{L1})\text{BF}_4@ \text{Al}_2\text{O}_3$ .

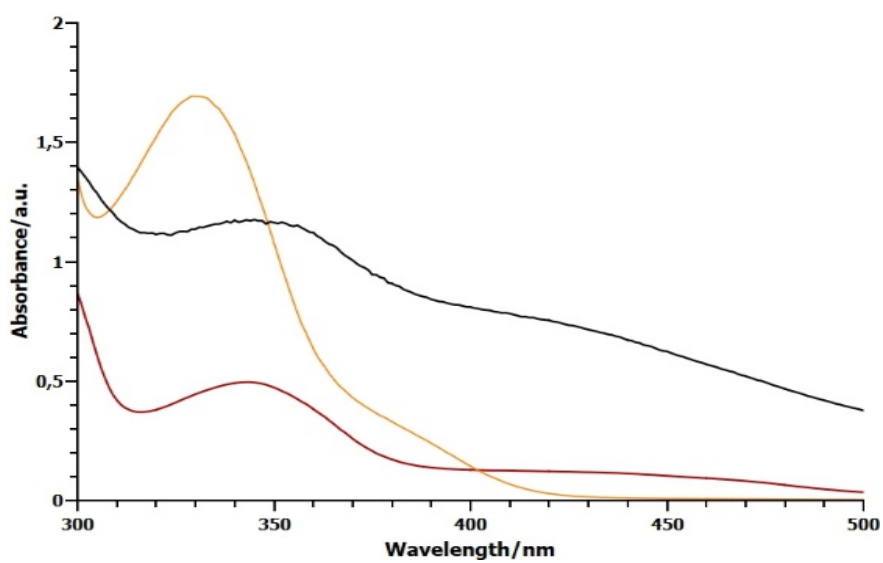

**Figure S21.** UV/Vis measurements of L3 (orange),  $\text{Cu}(\text{L3})_2\text{BF}_4$  (blue) and  $\text{Cu}(\text{L3})_2@ \text{SiO}_2$  (grey)

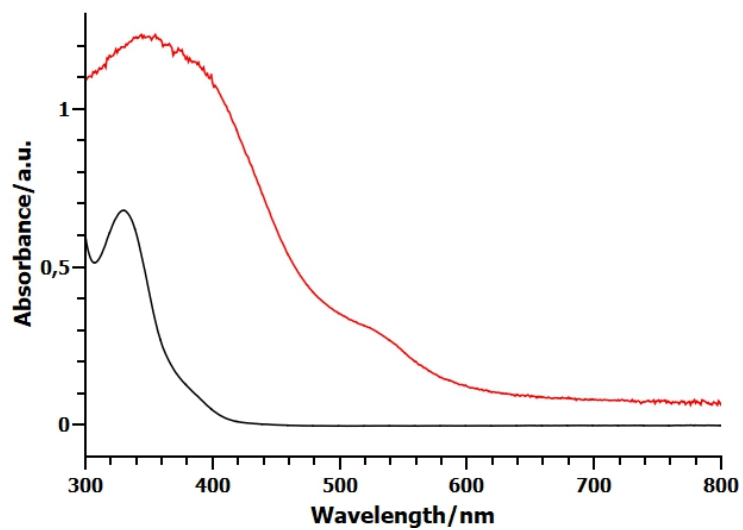

**Figure S22.** UV/Vis measurements of L1 (black) and L1@alumina (red)

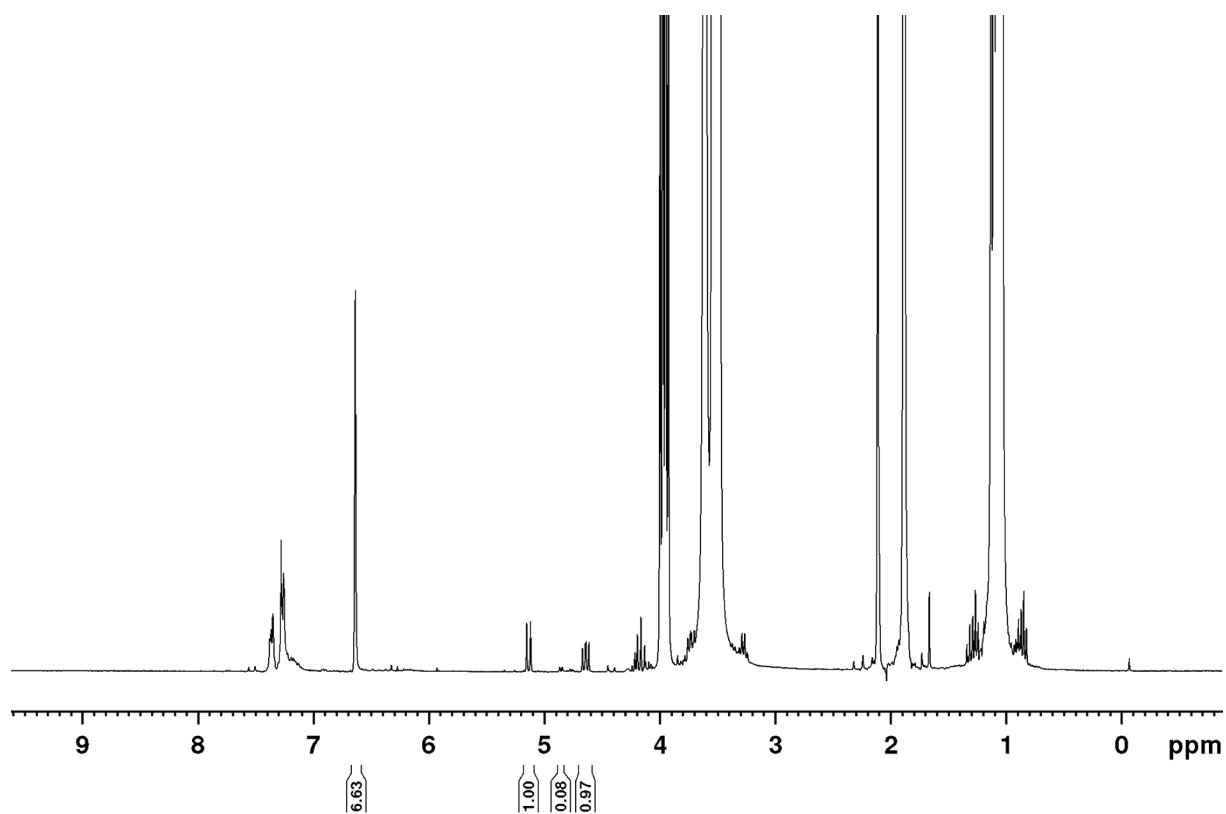

**Figure S23.** Exemplary NMR-spectrum after the cyclization reaction of **1**.

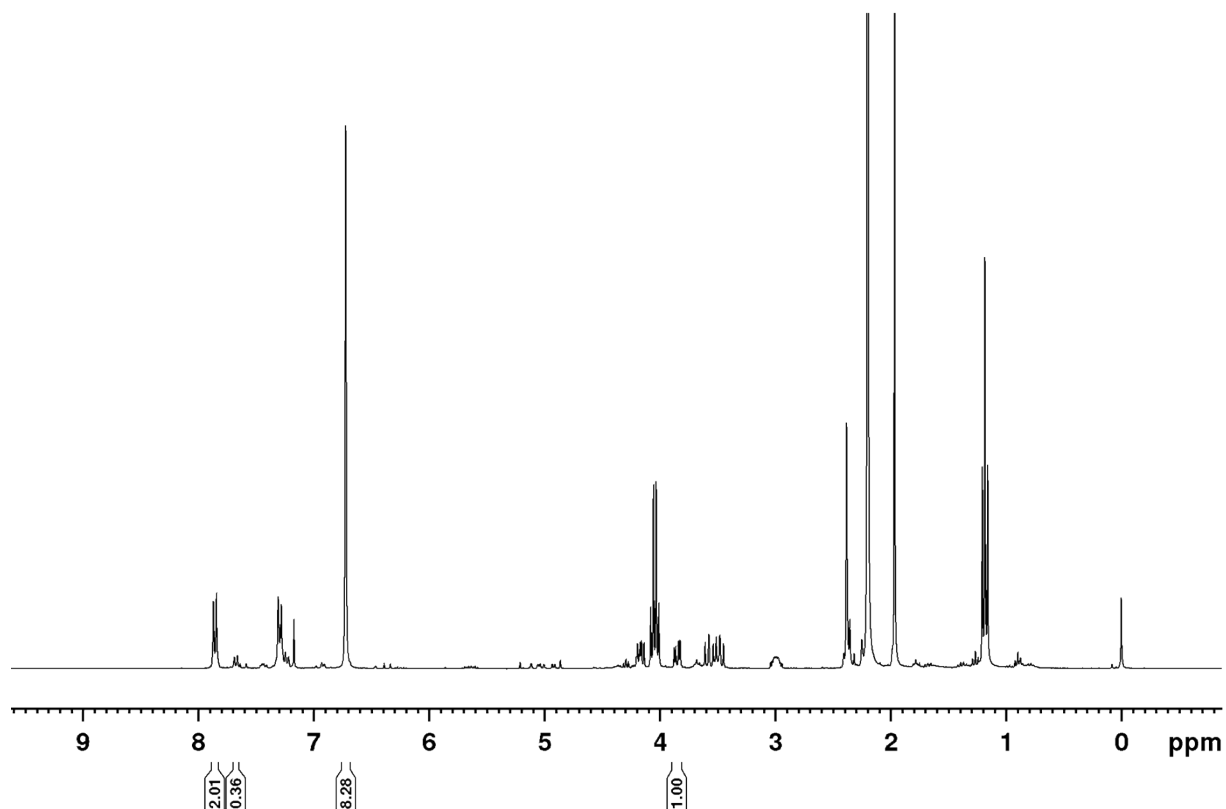

**Figure S24.** Exemplary NMR-spectrum after the cyclization reaction of **2**.

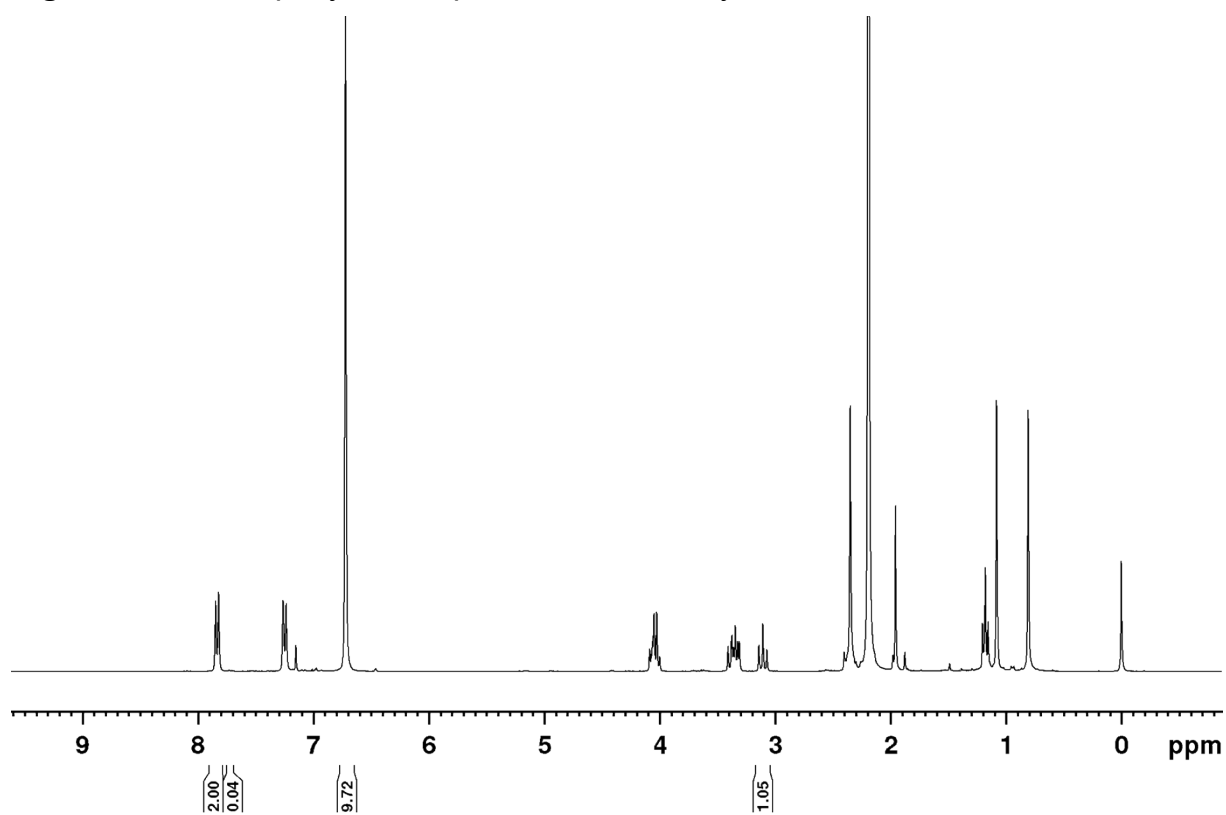

**Figure S25.** Exemplary NMR-spectrum after the cyclization reaction of **3**.
